# Supplementary material for: Tailoring the aluminum nanocrystal surface oxide for all-aluminum-based antenna-reactor plasmonic photocatalysts
Source: PubMed Central journal article supplement — Proc Natl Acad Sci U S A. 2024 Mar 5;121(11):e2321852121. doi: 10.1073/pnas.2321852121 (PMC10945844; doi:10.1073/pnas.2321852121), 2024-03-05
Supplement: pnas.2321852121.sapp.pdf [file pnas.2321852121.sapp.pdf]

## **Supporting Information for Tailoring the Aluminum nanocrystal surface oxide for all- Aluminum-based antenna-reactor plasmonic photocatalysts**

Aaron Bayles<sup>1,5</sup>, Catherine J. Fabiano<sup>7</sup>, Chuqiao Shi<sup>3</sup>, Lin Yuan<sup>1,5</sup>, Yigao Yuan<sup>1,5</sup>, Nolan Craft<sup>4</sup>, Christian R. Jacobson<sup>1,5</sup>, Parmeet Dhindsa<sup>1,5</sup>, Adebola Ogundare<sup>1,5</sup>, Yelsin Mendez Camacho<sup>3</sup>, Banghao Chen<sup>7</sup>, Hossein Robotjazi<sup>1</sup>, Yimo Han<sup>3</sup>, Geoffrey F. Strouse<sup>7</sup>, Peter Nordlander<sup>4,5</sup>, Henry O. Everitt<sup>1,2,4,5,6</sup>, and Naomi J. Halas<sup>1,2,4,5</sup>

Corresponding Author: Naomi J. Halas

Email: [halas@rice.edu](mailto:halas@rice.edu)

**This PDF file includes:**

Figures S1 to S21  
Supplementary Notes

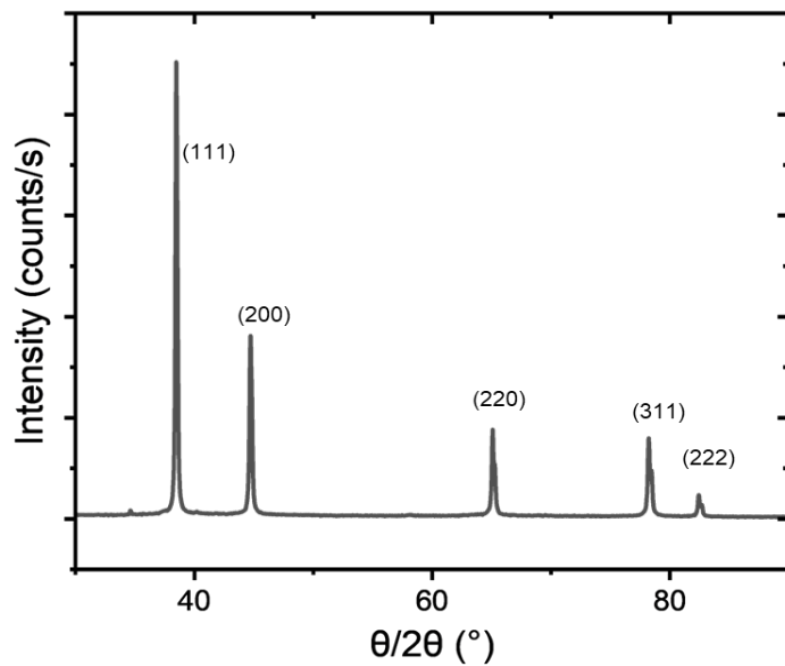

**Fig. S1.** XRD of untreated AINCs. Only peaks pertaining to fcc aluminum are observed.

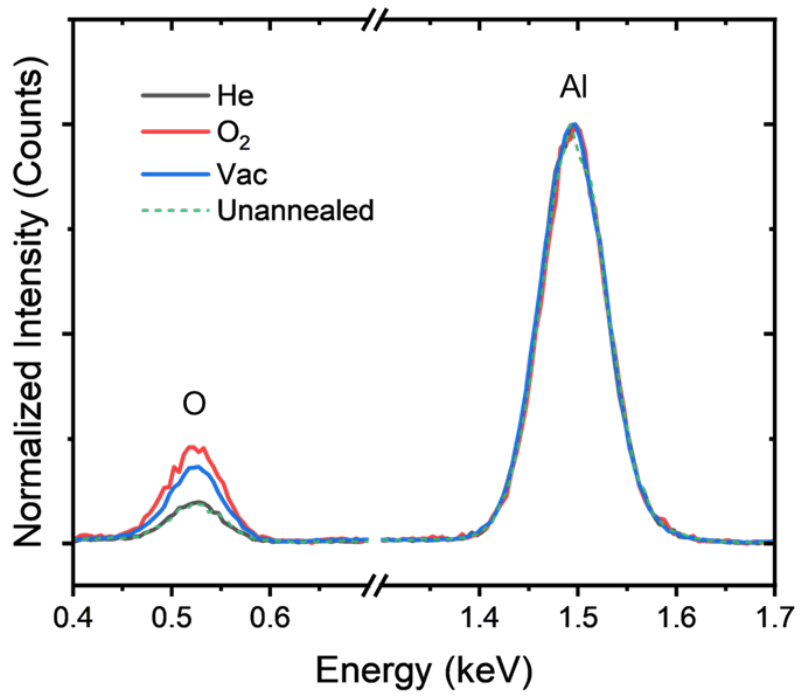

**Fig. S2.** Normalized EDX spectra of single unannealed and annealed AINCs showing the relative signal of Al and O.

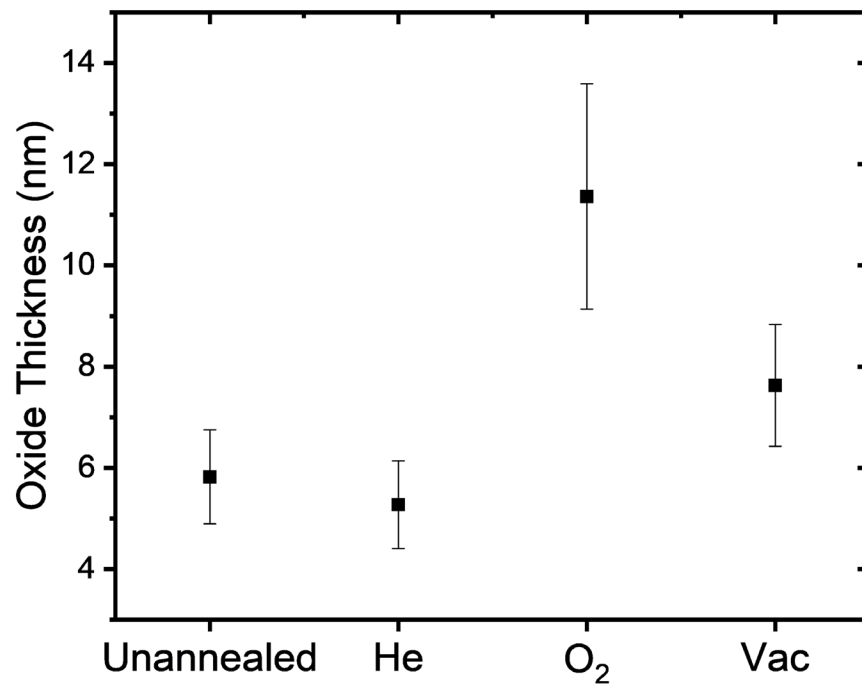

**Fig S3.** Oxide thickness measured in TEM as a function of annealing condition.

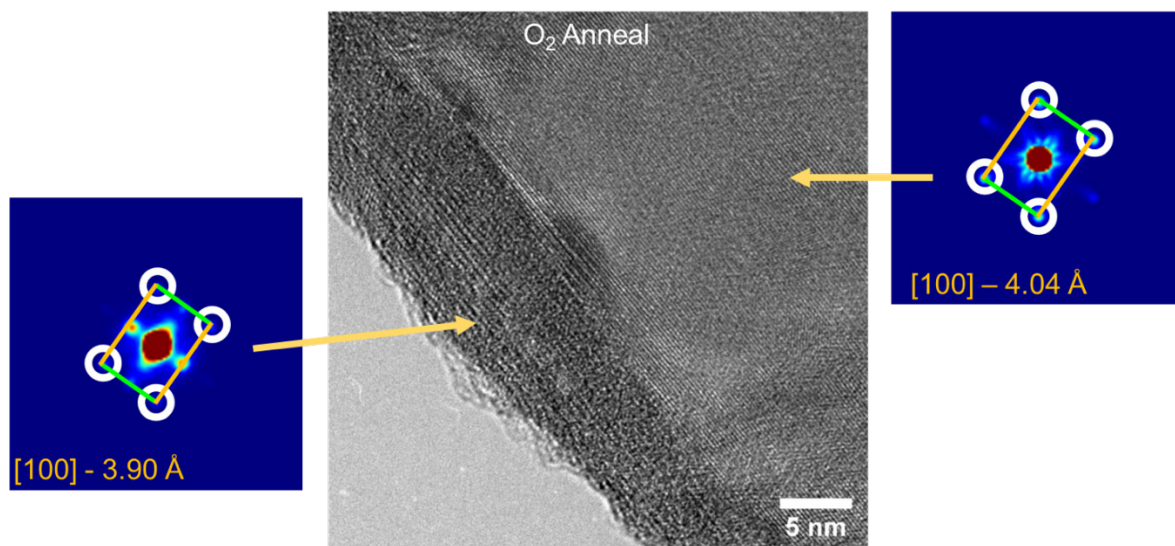

**Fig S4.** HRTEM image of the edge of an  $O_2$ -annealed AINC, with FFT of the mean electron diffraction and measured lattice spacing for the core and shell regions.

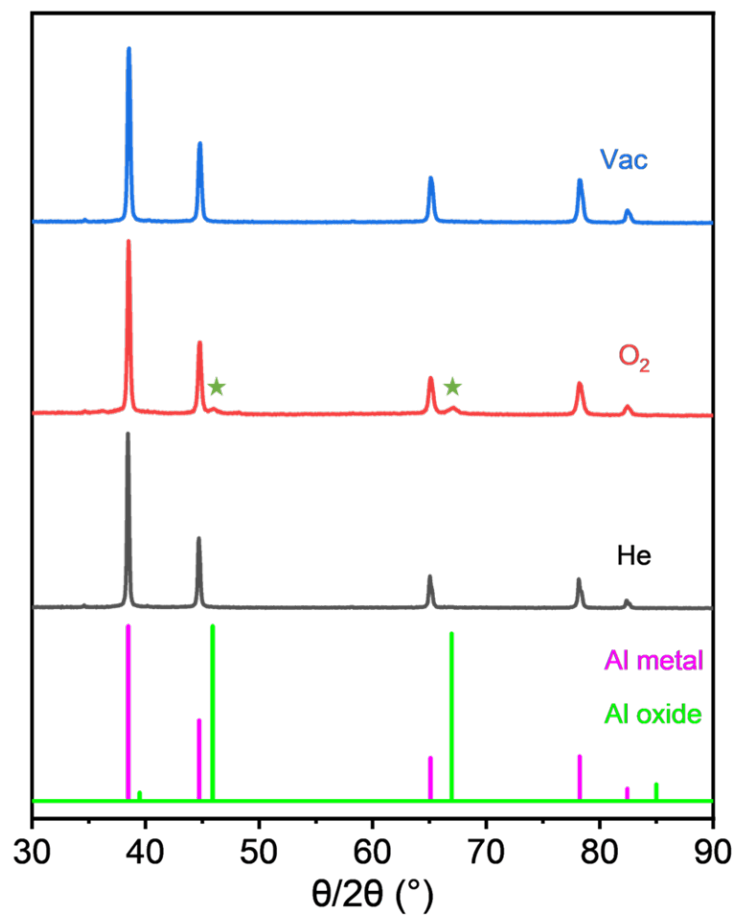

**Fig S5.** XRD patterns of annealed AINCs compared to literature patterns. Oxide peaks in experimental diffractogram are marked with green stars.

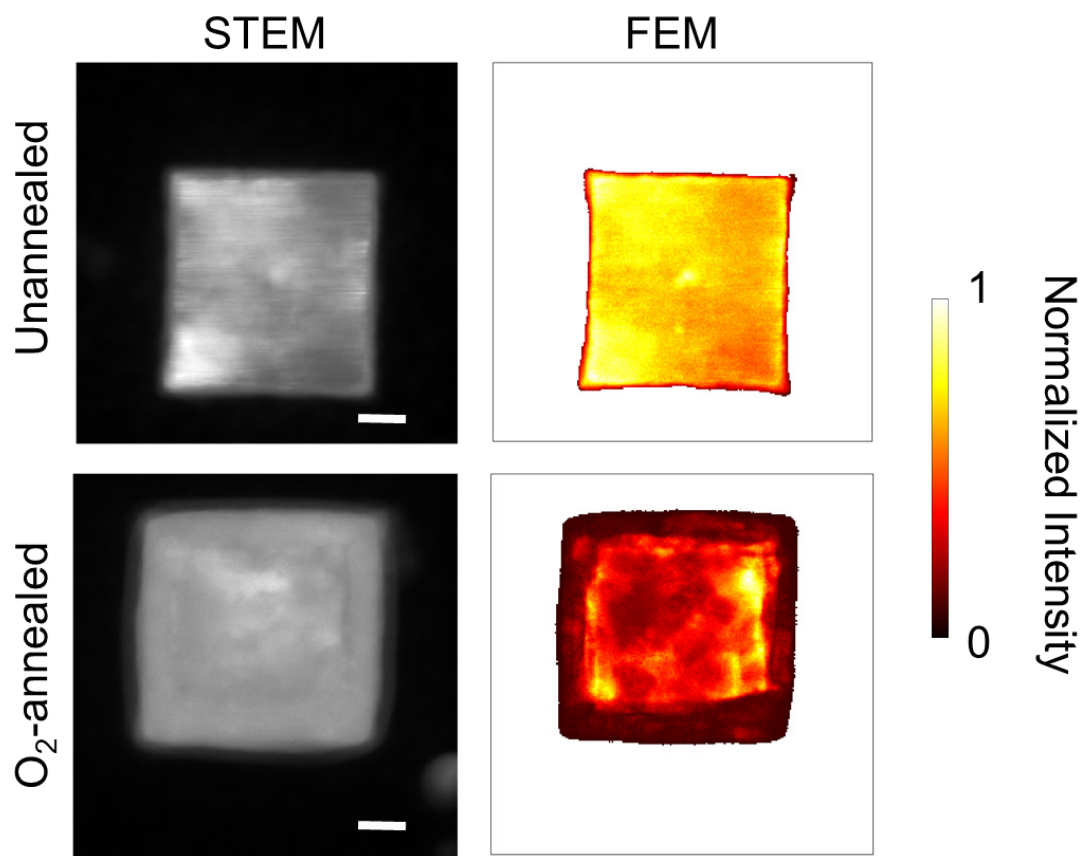

**Fig S6.** (Left column) STEM images of unannealed and O<sub>2</sub>-annealed Al nanocubes. (Right column) Corresponding FEM maps of the images particles.

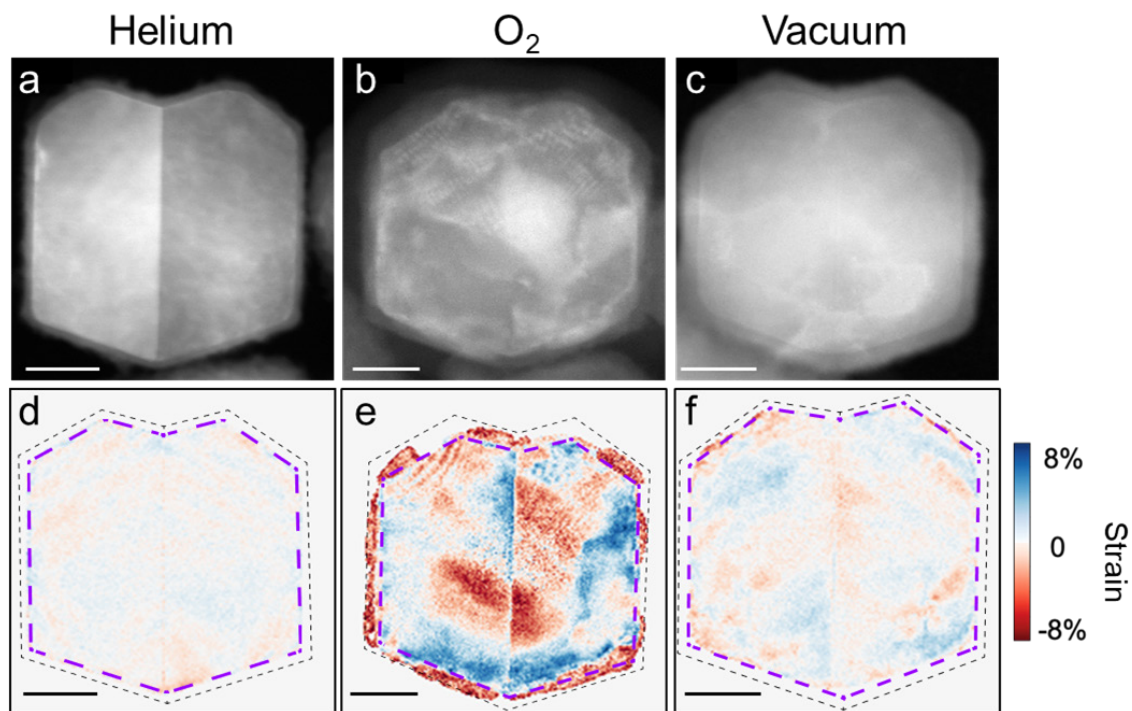

**Fig S7.** (a-c) HAADF-STEM images of single annealed AINC. Scale bars are 50 nm. (d-f) Corresponding 4D-STEM strain mapping. Black dashed outline shows total particle sizes, purple dashed outline shows metal-oxide interface.



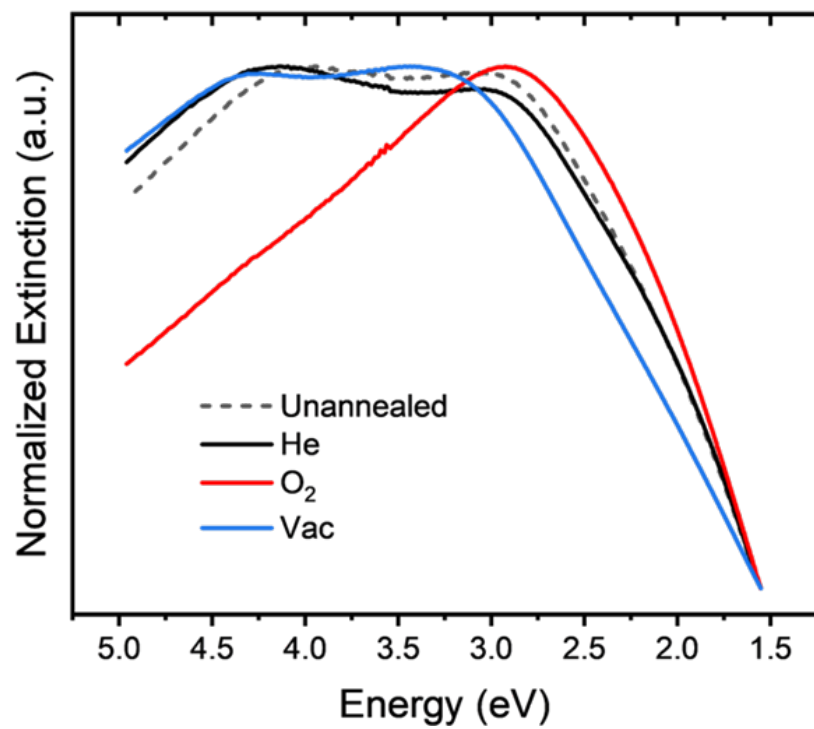

Fig S8. Experimental extinction spectra of unannealed and annealed AINCs.

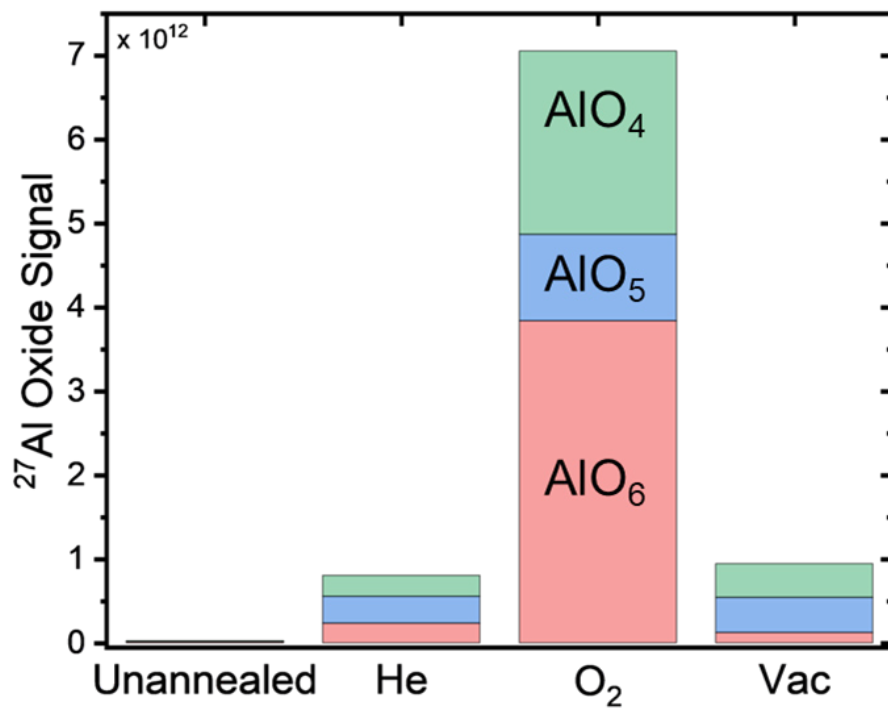

**Fig S9:** Absolute  $^{27}\text{Al}$  ssNMR signal for each oxide coordination site in unannealed and annealed AINCs.

| Sample                | Site Coordination (%) |                  |                  |
|-----------------------|-----------------------|------------------|------------------|
|                       | AlO <sub>4</sub>      | AlO <sub>5</sub> | AlO <sub>6</sub> |
| Unannealed            | 23.48                 | 31.17            | 45.35            |
| He anneal             | 31.13                 | 39.84            | 29.03            |
| O <sub>2</sub> anneal | 30.92                 | 14.66            | 54.42            |
| Vacuum anneal         | 42.46                 | 33.59            | 12.95            |

**Fig S3.** Summary of ssNMR site coordination percentages.

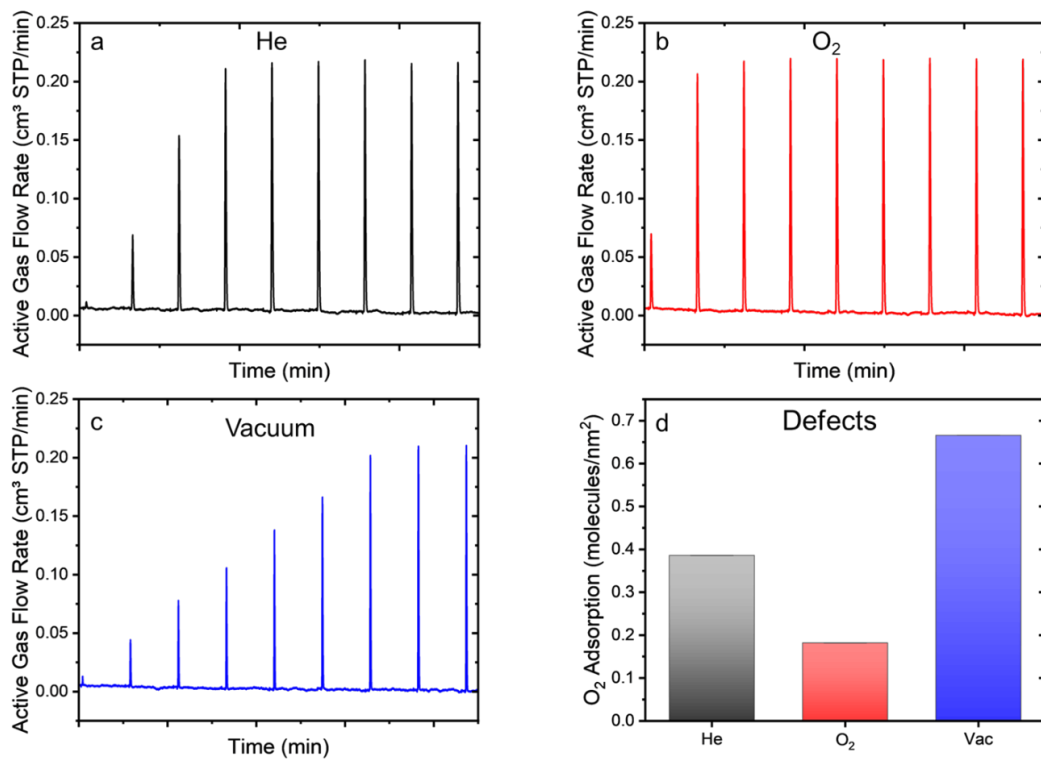

**Fig S11.** Cryogenic O<sub>2</sub> pulse chemisorption on annealed AINCs. (a-c) Raw O<sub>2</sub> pulse data. Each peak corresponds to the injection of ~0.5mL of 10% O<sub>2</sub> in He into the gas flow over the annealed samples, after which only unadsorbed O<sub>2</sub> is detected by the thermal conductivity detector. (d) Surface defect density based on the amount of adsorbed O<sub>2</sub> calculated from the pulse chemisorption data.

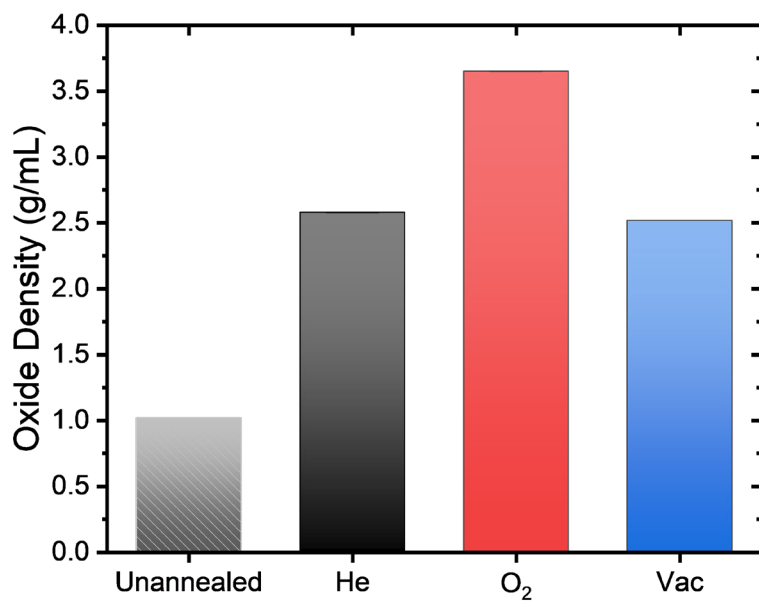

**Fig S12.** Oxide density of AINCs.

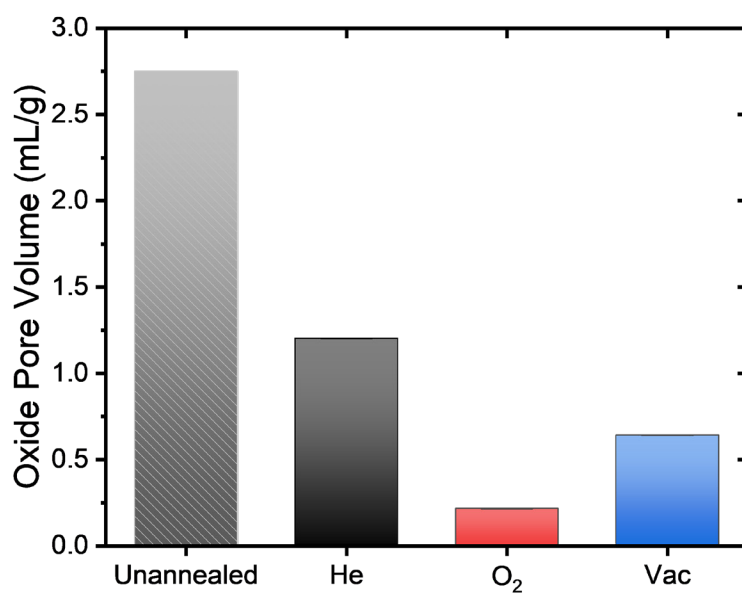

**Fig S13.** Oxide pore volume of annealed AINCs.

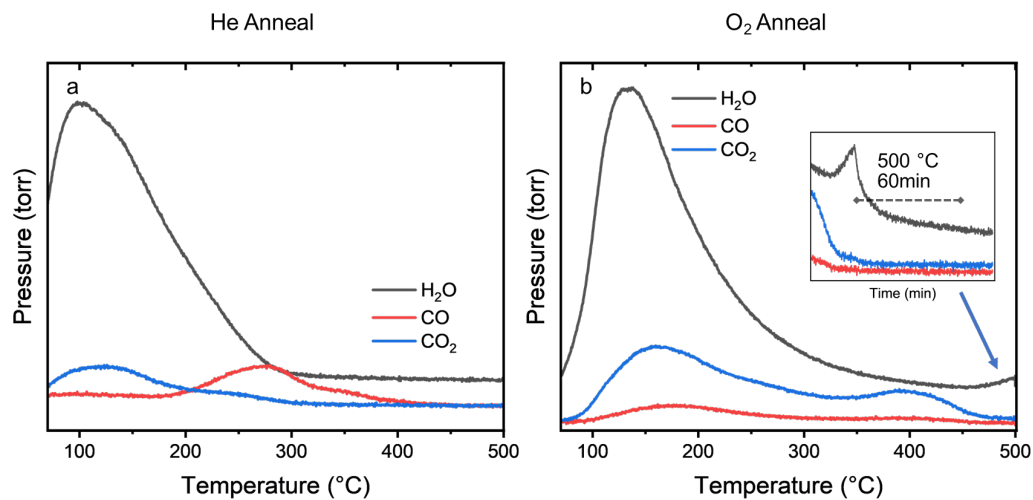

**Fig S14.** Mass spectrometer traces of outgassing during He (a) and O<sub>2</sub> (b) annealing. (b, inset) Time profile of gas desorption during O<sub>2</sub> annealing while temperature was held at 500 °C for one hour.

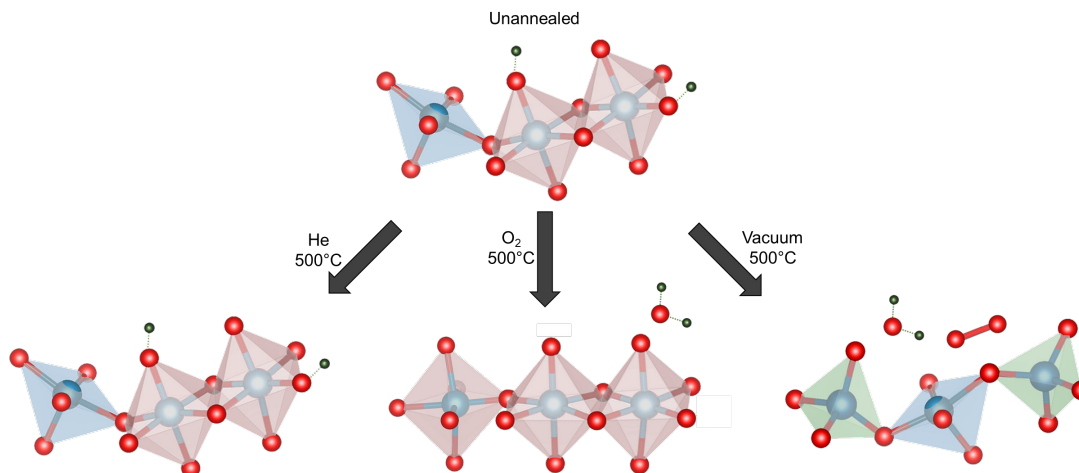

**Fig S15.** Graphical representation of the effect of annealing on the local alumina coordination and structure. He annealing causes no change except for the desorption of atmospheric H<sub>2</sub>O and carbon contamination. O<sub>2</sub> annealing fills defect sites, increasing crystallinity, and oxidizes hydroxyl groups, which leave as H<sub>2</sub>O. Vacuum annealing causes the conversion of AlO<sub>6</sub> to lower coordination sites through dehydration and dehydroxylation.



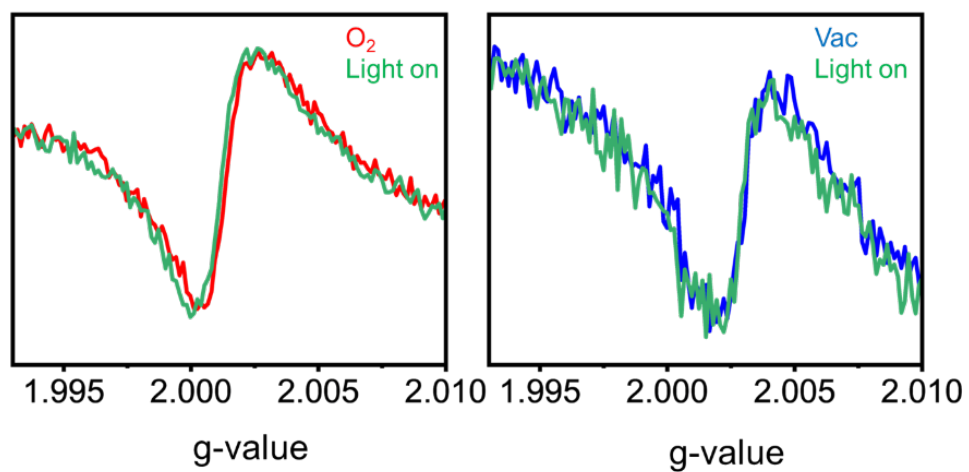

**Fig S16.** Comparison of illuminated and dark EPR signals for O<sub>2</sub>-annealed (left) and Vacuum-annealed (right) AINCs.

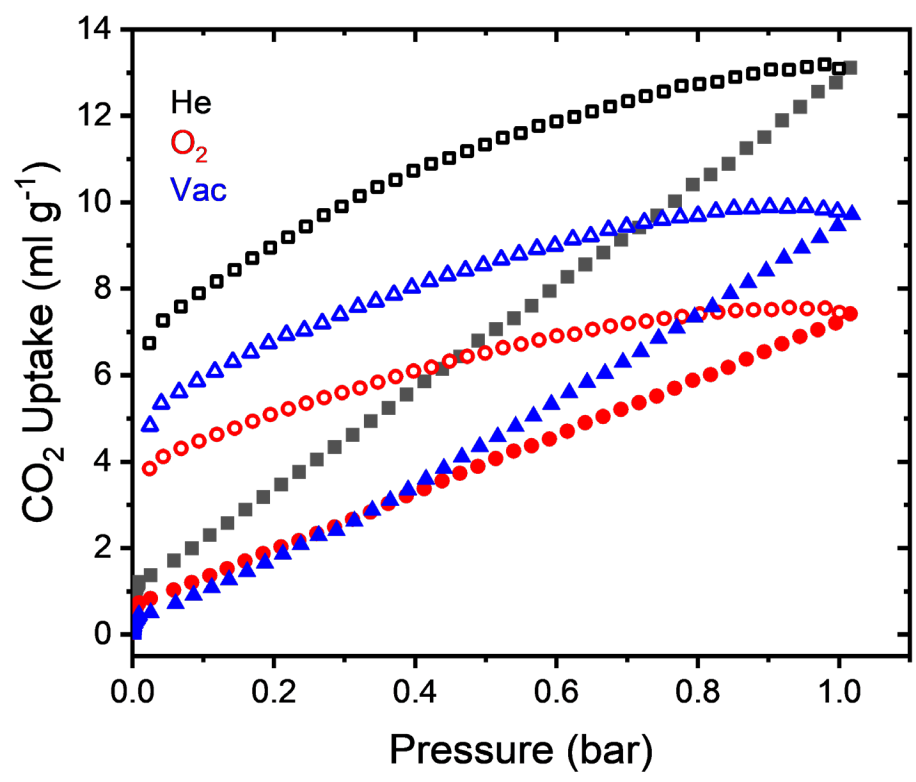

Fig S17. CO<sub>2</sub> uptake isotherms for the annealed AINCs.

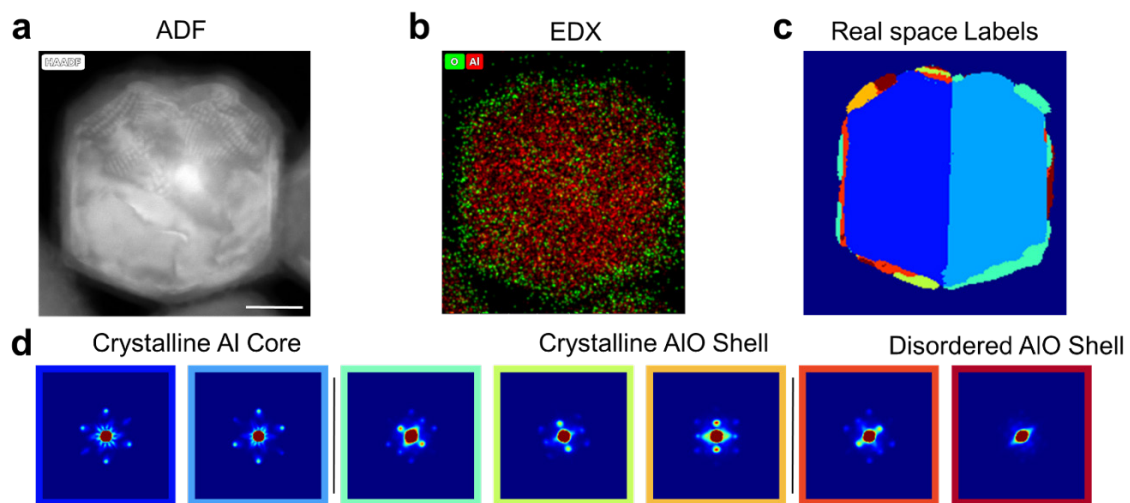

**Fig S18.** Unsupervised learning results on  $O_2$ -annealed AINC 4D-STEM dataset. (a) Annular Dark Field image. (b) EDX. (c) Corresponding Real space labels of crystalline domains. (d) Mean cepstrum images for each domain cluster.

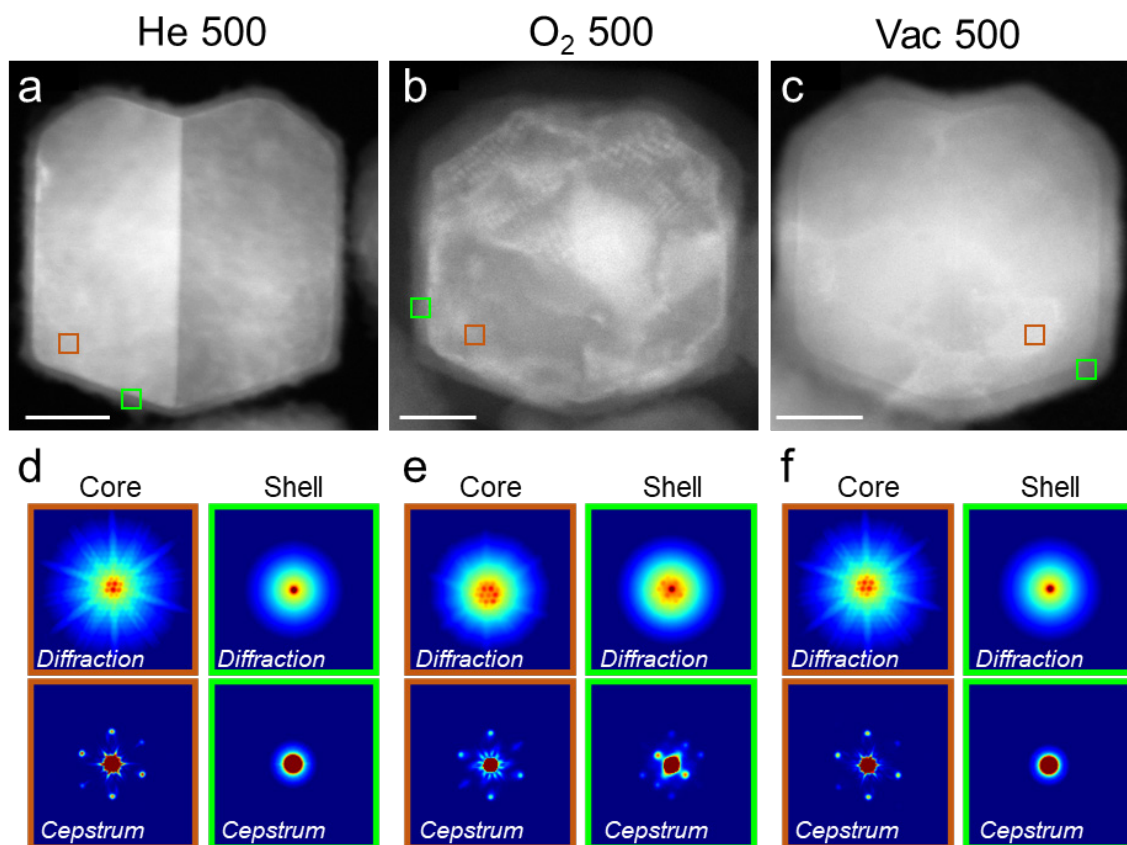

**Fig S19.** (a-c) HAADF-STEM images of single annealed AINCs. Scale bars are 50 nm. (d-f) Mean electron diffraction and FFT of the diffraction (cepstrum) of core (orange) and oxide (green) region, noted with colored boxes.

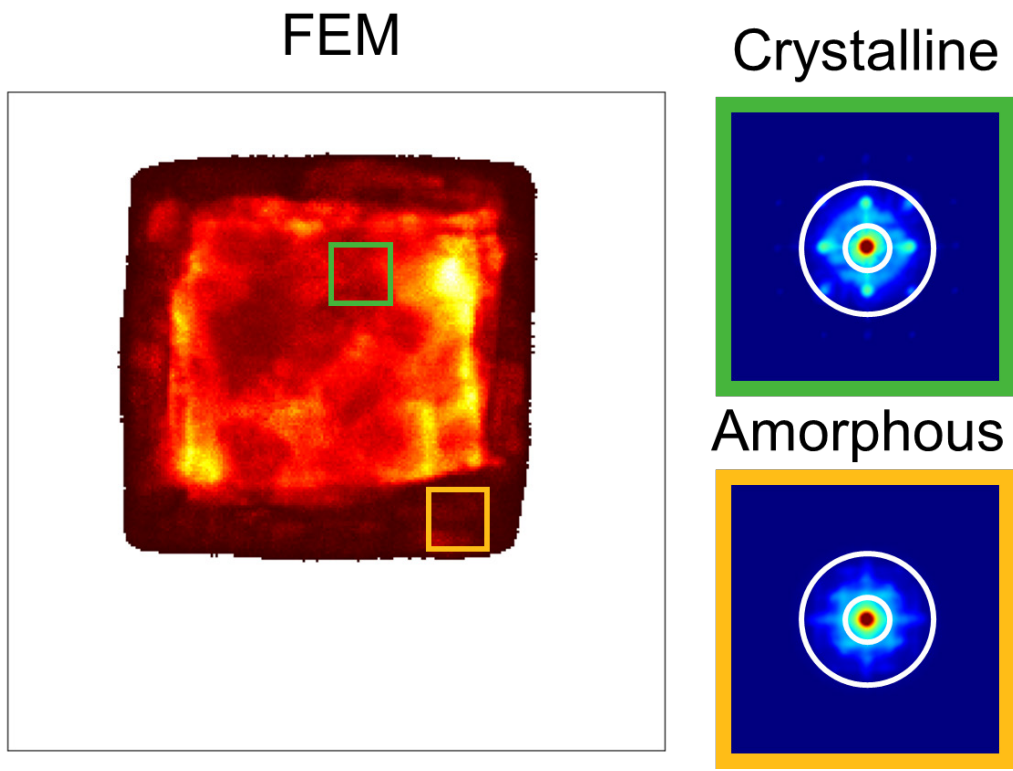

**Fig S20.** Processing of FEM image, demonstrating the difference between crystalline and amorphous areas. The middle range order regions are enclosed by the white rings

## Supplementary Note 1

Oxide density was determined by first calculating the %mass of the oxide ( $\mu_{\text{oxide}}$ ) in each sample. By summing the integration of the metal and oxides peaks in  $^{27}\text{Al}$  ssNMR, the total sample mass can be expressed by NMR signal intensity, and

$$\mu_{\text{oxide}} = \frac{\int 27\text{Al Oxide Signal}}{\int 27\text{Al Total Signal}}. \text{ The oxide mass } (m_{\text{oxide}}) \text{ can be expressed as } m_{\text{oxide}} = m_{\text{sample}} \times \mu_{\text{oxide}}.$$

The volume of the oxide ( $V_{\text{oxide}}$ ) can be calculated by modeling the nanoparticles as core-shell spheres where the volume of the shell is expressed by the equation  $V_{\text{oxide}} = \frac{4}{3}\pi \times (r_{\text{outer}} - r_{\text{core}})$  where  $r$  is radius (Fig S). The outer and core radii are measured experimentally in TEM. Density ( $\rho$ ) can then be calculated as  $\rho = \frac{m_{\text{oxide}}}{V_{\text{oxide}}}$ . However, a correction factor ( $C$ ) must be introduced for two reasons: (1) Al metal and Al oxide may not produce the same ssNMR signal intensity as a function of mass and (2) volume is calculated for a single shell while the mass is calculated for a bulk sample. The correction factor is determined by using the  $\gamma$ -alumina of  $\text{O}_2$ -annealed as an internal density standard, as the density is known to be  $3.6 \text{ g/mL}^1$ . The equation can then be rewritten as  $\rho = \frac{m_{\text{oxide}}}{V_{\text{oxide}}} \times C$ .

References:

1. Villars, P.  $\gamma$ -Al<sub>2</sub>O<sub>3</sub> (Al<sub>2</sub>.67O<sub>4</sub> m- $\gamma$  cub) Crystal Structure: Datasheet from "PAULING FILE Multinaries Edition". (2022).
